# Supplementary material for: Pulsed turbidite and methane seep records in the north western South China Sea since the last glacial maximum
Source: Frontiers journal article supplement (doi:10.3389/fmars.2023.1147751), 2023-03-03
Supplement: Table_1.XLSX [file Table_1.XLSX]

## Sheet: Sheet1
Depth(cm)	Sand(%)	Silt(%)	Clay(%)	Mz(μm)	Dx (99)	Dx (50)	E1	E2	E3	Si/Al	Si/Fe	Zr/Rb	CaCO3（%）	TS (wt. %)	TOC (wt. %)	TS/TOC	Depth (cm)	CRS(wt. %)
2	13.51	65.63	20.86	11.0575	348.098	8.285	0	71.9243	11.9765	3.90315	16.118	0.985651	25.0788	0.393	0.879336	0.446928	4	0.00988959
4	9.27	68.65	22.0908	9.45554	305.071	7.684	0	77.7286	12.2479	3.98258	16.383	0.972072	21.1295	0.407	1.45345	0.280024	14	0.0257568
6	13.152	66.22	20.65	11.026	381.344	8.292	0	72.3002	12.7396	3.93217	16.5501	0.98258	26.0144	0.348	0.897018	0.387952	26	0.0206328
8	7.21	70.24	22.55	8.86972	310.022	7.471	0	80.4237	12.7379	3.90346	16.2488	0.962682	25.5087	0.13	0.767727	0.169331	38	0.0140312
10	15.38	64.47	20.15	11.7981	378.339	8.478	0	71.3949	10.0861	3.98528	16.5977	0.97573	22.2002	0.193	0.914906	0.210951	50	0.0102307
12	11.6	66.86	21.56	10.3524	354.815	7.951	0	74.8824	11.5355	4.00349	16.3146	0.997251	23.7952	0.142	0.753435	0.18847	62	0.125235
14	7.0107	70.43	22.58	8.79635	285.145	7.452	0	80.4898	12.8033	3.95654	16.321	0.993848	24.495	0.165	0.749425	0.220169	74	0.100565
16	5.8005	71.6	22.63	8.43505	259.14	7.343	0	82.9078	12.1879	3.91616	16.2357	0.970959	23.9083	0.148	0.729855	0.20278	82	0.0979278
18	8.982	68.95	22.08	9.4389	364.367	7.609	0	79.552	11.0831	3.94788	16.1425	0.986963	24.2047	0.165	0.834273	0.197777	86	0.0858236
20	13.4009	65.48	21.13	10.7238	301.759	8.06	0	74.4721	8.8905	4.02843	15.3814	0.955927	24.5163	0.224	0.75687	0.295956	90	0.922583
22	16.0307	63.42	20.51	11.7681	332.916	8.398	0	71.535	8.0689	4.06784	16.2351	0.94415	23.6923	0.205	0.925782	0.221434	92	0.995186
24	22.28	58.89	18.84	14.7598	401.863	9.409	0	65.2828	5.7809	4.02122	16.2415	0.978198	24.6007	0.18	0.786739	0.228792	93	1.10524
26	2.76	82.22	15.0403	9.05982	85.84	8.54	0	76.2879	23.7121	4.10382	16.7372	1.05583	28.3377	0.181	0.858113	0.210928	94	1.61821
28	21.282	59.7	19.03	14.3794	421.478	9.375	0	64.5032	8.5222	3.88675	16.2805	0.992314	26.2705	0.219	0.806279	0.271618	95	0.925243
30	16.402	63.61	19.99	12.1901	406.112	8.526	0	71.2116	8.9626	3.90915	16.5894	0.992923	25.1964	0.258	0.945216	0.272953	96	0.965064
32	15.1108	64.5	20.42	11.389	302.516	8.374	0	71.4901	9.7767	4.14112	17.7203	0.97772	22.5253	0.175	1.30589	0.134008	106	0.218785
34	6.62	71.07	22.31	8.60115	201.112	7.412	0	81.6242	12.3502	3.91215	16.7696	0.991379	25.0464	0.165	0.833235	0.198023	112	0.261555
36	27.651	53.87	18.51	17.2265	448.318	10.366	0	59.9577	3.6411	3.8533	15.8697	0.996532	25.4303	0.171	0.787145	0.217241	116	0.422929
38	21.693	58.85	19.45	14.2294	431.233	9.193	0	66.3551	6.2878	3.89993	16.1125	0.969023	25.2843	0.145	0.774666	0.187177	118	0.750051
40	10.0208	67.25	22.75	9.41093	302.953	7.485	0	79.6996	8.4905	3.99244	17.0208	0.994279	26.5956	0.269	0.827251	0.325173	119	0.85341
42	8.952	68.43	22.63	9.13135	347.767	7.375	0	82.8416	7.2893	3.88486	16.4066	0.974342	26.1615	0.169	0.889364	0.190023	120	0.856234
44	14.201	64.53	21.31	10.9004	402.811	7.992	0	75.8927	7.1452	3.8448	15.3911	0.986511	26.4074	0.188	0.739842	0.254108	123	1.1874
46	7.662	68.74	23.59	8.54297	269.965	7.04	0	85.9755	4.8704	3.8718	15.7388	0.931475	24.9218	0.225	0.758183	0.296762	124	0.846641
50	20.85	59.64	19.51	13.6428	392.283	8.939	0	67.9989	5.2756	3.78255	15.9962	0.974273	25.9954	0.157	0.719309	0.218265	134	0.186743
52	17.631	61.99	20.38	12.3071	425.176	8.402	0	72.2215	5.8916	3.82112	15.8344	0.954088	25.6854	0.167	0.746524	0.223704	146	0.220128
54	29.21	53.4	17.38	18.3056	418.905	10.877	0	57.8399	3.3622	3.90069	15.9363	0.941062	25.2038	0.244	0.754328	0.323467	152	0.268988
56	18.3305	61.05	20.63	12.6618	449.797	8.406	0	71.6702	5.3651	3.84663	15.6082	0.978319	24.9936	0.169	0.789569	0.214041	156	0.287132
58	26.5305	55.01	18.43	16.1761	342.925	10.051	0	60.305	3.6614	3.84329	15.0963	0.804896	25.201	0.216	0.764666	0.282476	160	0.306043
60	22.82	57.73	19.45	14.7687	387.964	9.489	0	62.2659	7.4715	3.87626	15.6413	0.926332	23.3819	0.185	0.803049	0.230372	162	0.340903
62	17.5006	62.09	20.41	12.063	300.368	8.503	0	69.5725	7.8199	3.87718	16.0635	1.0199	27.0042	0.195	0.908202	0.21471	172	0.0568644
64	18.9	61.04	20.05	12.9338	381.248	8.672	0	69.47	6.1031	3.80401	16.5756	0.973394	26.7567	0.24	0.84791	0.283049	184	0.0856032
66	21.1	58.86	20.04	13.6351	397.899	8.705	0	69.3585	2.8535	3.73631	15.7536	0.888727	23.176	0.209	0.717765	0.291182	192	0.100539
68	22.18	57.99	19.84	14.0114	399.315	8.812	0	68.8005	1.8113	3.77817	15.9146	0.934762	23.8503	0.225	0.726818	0.309568	202	0.118014
70	30.68	51.9	17.42	18.9053	424.194	10.952	0	57.5196	1.3654	3.83918	16.2031	0.922698	23.997	0.2	0.809204	0.247157	212	0.0600972
72	22.481	57.6	19.94	14.3064	450.335	8.844	0	68.7851	1.9797	3.85411	15.5445	0.961916	25.0029	0.194	0.858449	0.225989	222	0.112435
74	20.021	59.27	20.73	12.9069	427.275	8.395	0	71.5921	2.5705	3.80399	15.379	0.931605	25.4935	0.207	0.849551	0.243658	236	0.105237
76	22.6805	57	20.29	13.9261	399.427	8.641	0	69.5459	0	3.80885	15.7716	0.864462	22.378	0.226	1.03356	0.218662	242	0.142882
78	34.96	48.31	16.73	21.617	423.836	12.479	0	52.4016	0	3.85658	15.4731	0.892782	25.0574	0.212	0.781905	0.271133	254	0.445894
80	36.2907	47.28	16.41	22.3025	384.764	12.909	0	50.0715	0	3.79714	15.3037	0.795717	25.2805	0.288	0.89513	0.321741	256	0.449675
82	40.87	44.18	14.94	26.6375	429.836	16.74	0	44.5382	0	3.81902	15.4116	0.863647	26.0369	0.238	0.964323	0.246805	259	0.515481
84	25.1304	54.75	20.12	16.1148	541.082	9.405	0.115	64.2332	3.4254	3.99623	15.9669	1.03575	25.8918	0.28	0.861744	0.324923	260	0.515811
86	17.3804	64.27	18.3509	13.6177	344.878	10.253	0	56.2163	23.7033	4.15226	17.1287	1.02048	27.0049	0.208	0.848112	0.245251	262	0.431406
88	11.422	70.65	17.95	12.1657	243.24	10.402	0	51.1824	38.5568	4.69381	18.6458	1.20211	25.0077	0.392	0.707876	0.553769	268	0.296205
89	15.9509	66.84	17.231	14.4611	320.571	12.13	0.0657	41.0446	42.1054	4.78093	18.4733	1.1578	27.7774	0.42	0.675382	0.621871
90	28.927	58.56	12.521	24.4635	457.891	24.675	0.3466	15.8138	51.4124	6.36475	18.558	2.28159	38.0525	0.917	0.641878	1.42862
91	30.032	54.44	15.51	21.2074	457.423	15.68	0.2022	37.1551	25.8404	5.92532	17.7925	2.00457	41.1155	0.733	0.654161	1.12052
92	22.94	57.43	19.621	15.5953	356.956	11.016	0.2917	47.1185	22.9641	6.01637	15.3217	2.14717	47.1703	1.152	0.787296	1.46324
93	29.842	53.58	16.6107	19.6245	432.95	12.801	0	46.5338	15.355	5.86634	14.1533	1.87777	50.6143	1.402	0.863852	1.62296
94	64.0007	27.9	8.1	102.34	1326.08	200.297	2.732	16.6252	24.1684	6.70269	13.0131	2.33985	50.1103	1.722	0.704354	2.44479
95	42.2707	34.33	23.4311	23.9007	654.504	32.557	40.1035	0	17.0028	5.33733	14.5237	1.39654	46.4212	1.273	0.867225	1.4679
96	13.4203	46.78	39.8217	5.26699	325.105	5.65	66.9373	8.5887	15.152	4.99132	14.5236	1.2853	45.143	1.203	0.950671	1.26542
98	20.891	56.99	22.121	12.9646	459.675	8.054	0.1911	71.8165	0	3.75469	14.6311	0.959825	23.9331	0.467	0.83688	0.558025
100	24.8209	55.02	20.171	15.5339	468.771	9.405	0.1754	60.7361	6.5321	3.68819	14.6561	0.922157	25.1022	0.454	0.806527	0.562907
102	18.463	58.81	22.7009	11.9498	408.315	7.848	0.2077	71.9605	2.8792	3.81822	14.632	0.927295	19.5601	0.37	0.78185	0.473236
104	22.4609	56.02	21.4909	13.89	456.574	8.484	0.1768	67.6002	2.177	3.73849	14.3529	0.884366	24.1635	0.494	0.849224	0.581707
106	17.161	60.79	22.031	12.0682	450.95	8.137	0.3212	68.3084	9.7855	3.79749	14.916	1.04958	20.7225	0.423	0.842302	0.502195
108	18.871	61.08	20.0008	13.8194	455.836	9.487	0.1535	59.0068	18.1354	3.81342	15.0735	1.08115	21.186	0.416	0.806668	0.515702
110	18.29	63.63	18.05	14.4859	362.126	10.946	0	50.5037	28.286	4.30304	16.4769	1.17014	22.3944	0.424	0.781594	0.542481
112	21.131	59.51	19.3409	14.7824	443.719	9.981	0.0523	57.1432	16.9108	4.1024	16.2365	1.10145	23.0409	0.465	0.78399	0.59312
114	18.8708	61.15	19.971	13.9331	435.21	9.671	0.274	55.4318	21.277	4.04253	16.4911	1.06837	21.9432	0.49	0.785761	0.623599
116	24.541	60.43	15.02	19.2039	395.123	16.21	0.1494	31.08	40.43	4.72082	17.6467	1.13278	28.2896	0.65	0.613888	1.05882
117	27.4203	59.39	13.2109	22.6334	348.204	24.255	0.3359	15.3165	52.1878	5.4231	18.4725	1.48413	32.5276	0.825	0.625126	1.31973
118	11.7505	52.32	35.9411	5.86067	271.861	6.636	61.1622	4.1867	29.4753	5.91354	18.463	1.62069	37.1874	0.985	0.565722	1.74114
119	23.207	59.74	17.051	17.2082	347.808	13.676	0.2963	36.4438	35.3516	5.88687	17.3667	1.52417	39.2762	1.014	0.89497	1.133
120	29.671	57.66	12.68	24.6912	439.452	26.382	0.4024	12.7489	53.3354	6.3642	18.6348	2.59625	37.7712	1.073	0.635638	1.68807
121	28.4302	58.54	13.061	23.2673	350.802	23.197	0.0673	18.0144	47.2612	5.77195	18.1926	2.12403	36.3332	0.96	0.568272	1.68933
122	24.7803	59.64	15.551	19.1136	345.664	16.96	0.3285	27.716	42.8352	5.54804	17.1435	1.62952	40.6862	0.985	0.685699	1.43649
123	56.9805	35.39	7.66	52.5312	462.829	16.637	0	3.4592	23.0071	5.53242	13.2595	1.37403	51.7782	1.405	0.754126	1.86308
124	41.472	42.56	15.951	27.3054	463.682	22.355	0	37.4069	6.2138	3.98685	13.2148	1.0009	30.9937	0.973	0.829272	1.17332
126	35.6401	45.1	19.271	20.6732	420.512	11.693	0	50.5218	0	3.60569	14.4122	0.868463	20.7179	0.45	0.85286	0.527636
128	32.7504	46.77	20.481	19.1458	535.525	10.366	0.2352	55.4815	0	3.67778	14.3294	0.875349	21.9979	0.473	0.839199	0.563633
130	41.8705	40.84	17.271	26.7958	512.505	17.351	0	43.4811	0	3.51648	13.5956	0.791737	21.0494	0.492	0.893059	0.550915
132	29.4503	48.49	22.071	16.792	469.93	9.144	0.2269	59.055	0	3.51367	13.6379	0.875336	20.9186	0.496	0.898764	0.551869
134	38.0001	43.55	18.451	22.4922	363.639	13.779	0	45.7144	0	3.64841	13.6249	0.886307	20.9914	0.562	1.01003	0.55642
136	32.7605	47.58	19.671	19.1569	373.126	11.089	0	52.8807	0	3.6088	13.6286	0.938861	20.5506	0.511	0.912946	0.559726
138	27.3206	51.9	20.791	16.3045	375.767	9.664	0	58.5175	2.2234	3.71584	14.2685	0.930923	21.1183	0.565	0.874786	0.645872
140	29.56	51.31	19.091	18.3863	398.7	11.227	0	52.736	6.0697	3.78202	14.8586	0.963021	20.0107	0.508	0.98775	0.5143
142	25.7506	54.61	19.631	16.3829	368.712	10.399	0	55.2559	8.7868	3.79464	15.4254	0.973793	19.437	0.482	0.946631	0.509174
144	19.09	61.99	18.911	14.4555	373.005	10.493	0	53.5658	22.7298	3.98585	15.8792	1.10663	18.8501	0.575	0.987084	0.582524
146	25.8208	53.94	20.2607	16.3336	439.602	10.162	0.0752	56.3688	8.7337	3.89017	15.6765	1.03738	19.0259	0.524	0.955979	0.548129
148	20.641	57.16	22.201	13.3918	428.128	8.535	0.2444	64.3035	7.3553	3.7514	15.1104	0.913234	20.1354	0.554	0.932789	0.593918
150	20.219	56.59	23.201	12.5663	351.538	8.032	0.1926	67.6015	3.0192	3.62425	14.3434	0.937274	21.8665	0.574	0.934964	0.613927
152	20.76	55.75	23.47	12.6976	363.553	7.987	0.1945	68.2119	1.5	3.62416	14.0569	0.917812	21.1061	0.599	0.966252	0.619921
154	30.04	50.44	19.531	18.2349	403.805	10.977	0	53.5193	4.5495	3.70784	14.5399	0.950963	20.7245	0.552	0.982068	0.562079
156	18.123	43.5	38.3815	6.10678	409.159	5.958	65.0268	11.9086	7.1122	3.5031	14.5706	0.932632	16.7282	0.609	1.16182	0.524178
158	17.642	43.64	38.7212	6.08082	461.661	5.825	64.7629	13.1123	6.8874	3.38034	14.7832	0.934283	17.3917	0.608	1.10216	0.551645
160	12.26	76.97	10.8	17.2376	343.72	16.854	0	19.0936	75.8259	5.62142	24.5804	1.595	16.8641	0.528	0.575494	0.917473
162	16.932	65.62	17.4509	14.7031	294.089	12.122	0.0339	41.405	39.1898	5.0152	20.2258	1.40921	23.9783	0.623	0.781456	0.79723
164	18.6606	59.03	22.331	12.1458	291.262	8.305	0.0278	66.5081	7.378	3.69048	15.8229	0.974392	25.9516	0.448	0.93456	0.47937
166	25.35	54.18	20.501	15.5135	397.386	9.562	0	59.7494	5.2281	3.67435	15.1957	0.963817	26.4373	0.468	1.12625	0.415537
168	21.69	55.97	22.311	13.4094	363.77	8.402	0.0962	65.9898	2.8253	3.72499	15.3169	0.977942	24.8775	0.473	1.22351	0.386593
170	10.093	46.54	43.3616	4.22008	376.166	4.852	73.0745	15.1509	7.3126	3.65529	14.937	0.990595	25.0035	0.453	1.11838	0.405049
172	27.772	52.2	20.011	17.2247	464.802	10.187	0.1057	57.4162	5.0583	3.70489	15.2284	0.999984	25.8844	0.444	1.12263	0.3955
174	35.352	46.87	17.761	21.6403	386.558	13.425	0	47.715	2.7567	3.77305	14.939	0.985405	27.0655	0.439	1.18084	0.371771
176	37.032	45.66	17.301	23.8428	484.021	14.691	0	46.3827	3.8793	3.70428	15.1517	0.99358	28.3718	0.455	1.16403	0.390885
178	15.991	43.07	40.931	5.4068	426.877	5.339	68.0319	12.1877	6.3666	3.61426	14.6854	0.994805	27.945	0.449	1.26526	0.354869
180	18.722	42.17	39.1515	6.20755	466.897	5.753	64.8665	12.2824	5.8177	3.66584	15.2706	0.964028	28.1952	0.483	1.40522	0.343719
182	12.861	44.46	42.6817	4.70273	407.281	4.981	70.8919	13.4972	6.7734	3.54286	14.4398	0.972752	26.2651	0.503	1.73692	0.289593
184	16.43	39.25	44.31	4.68004	358.27	4.829	82.4014	0	4.748	3.69258	14.1024	0.989596	27.4419	0.438	1.16565	0.375756
186	31.3606	48.3	20.36	18.1617	374.504	10.643	0.0015	54.4014	0.5478	3.67276	14.4596	0.964214	25.0664	0.449	1.17082	0.383491
188	19.8106	55.36	24.831	11.8718	308.877	7.5	0.2914	69.621	0	3.93702	16.3718	0.964805	24.6992	0.421	1.28491	0.32765
190	13.3606	41.03	45.6504	4.13291	317.63	4.563	83.3449	2.3561	5.3671	3.65211	15.5465	0.953275	26.3283	0.511	1.23935	0.412315
192	13.32	42.48	44.2105	4.42868	337.46	4.767	78.0434	5.7121	6.9371	3.65617	15.3466	0.924377	25.0974	0.495	1.19711	0.413497
194	19.0806	37.59	43.3016	5.23691	403.813	5.056	80.0314	0	3.1497	3.62974	14.9275	0.916931	23.5902	0.416	1.16805	0.35615
196	35.601	45.68	18.711	21.5775	458.72	12.368	0.031	50.8852	0	3.49651	14.9976	0.919535	24.1944	0.558	1.14551	0.48712
198	12.011	41.62	46.3513	3.94055	361.201	4.411	81.882	7.9895	2.7452	3.52339	14.859	0.910016	23.1351	0.54	1.10268	0.489716
200	12.881	40.81	46.311	3.99578	350.612	4.436	83.4629	4.3191	4.1625	3.60647	15.144	0.890662	22.3274	0.419	1.11964	0.374227
201	23.773	53.42	22.811	14.0955	432.655	8.376	0.2895	65.6625	0.4985	3.53029	15.2953	0.9015	21.2975	0.431	1.15327	0.373719
202	15.44	40.51	44.0313	4.63448	360.231	4.818	78.2172	5.9759	3.3981	3.5186	15.3568	0.92338	21.6686	0.434	1.11873	0.38794
204	13.5603	41.3	45.1515	4.22873	330.906	4.602	79.2915	8.7029	1.7797	3.67982	16.0825	0.891853	20.0836	0.391	1.159	0.337359
206	10.2408	44.01	45.7412	3.81177	263.454	4.466	77.0787	14.6137	2.2802	3.53007	14.8977	0.886278	19.7479	0.468	1.0893	0.429635
208	11.641	41.66	46.6715	3.8374	357.977	4.352	81.9672	9.7335	1.2501	3.59243	16.0834	0.88664	19.0948	0.561	0.967707	0.579721
210	25.9705	51.44	22.551	15.0823	494.645	8.436	0.3568	64.3491	0	3.58475	15.9812	0.864776	18.6117	0.365	0.945701	0.385957
212	14.58	41.72	43.7213	4.64924	360.56	4.775	72.8922	13.894	0.6223	5.56496	23.8806	1.17948	14.4373	0.297	0.516828	0.574659
214	32.8908	47.42	19.691	19.2827	385.202	10.839	0	53.0108	0	4.64131	20.2693	0.936615	14.014	0.278	0.757646	0.366926
216	30.571	48.52	20.911	17.8271	459.094	9.638	0.2059	57.5865	0	3.48624	15.6914	0.841414	16.8026	0.409	0.982887	0.416121
218	15.62	42.84	41.5114	5.19633	353.207	5.102	66.2915	18.2772	0.5298	3.48678	15.6633	0.840945	16.5774	0.101	0.96991	0.104133
220	13.5603	42.3	44.1714	4.41811	326.734	4.696	73.8419	14.3102	0.6525	3.43025	15.5134	0.82859	15.4746	0.218	1.04231	0.209151
222	6.58	44.71	48.6711	3.17156	285.908	4.059	81.4632	17.7977	0	3.46684	15.4852	0.81295	17.3739	0.309	1.1243	0.274839
224	29.95	49.39	20.671	17.4333	393.132	9.757	0.0332	57.1547	0	3.46634	15.4408	0.832728	14.2768	0.322	1.0361	0.310781
226	18.651	56.9	24.431	11.4666	310.98	7.412	0.2661	71.8505	0	3.50433	15.4148	0.888586	14.2213	0.286	1.00276	0.285212
228	9.32	43.6	47.0914	3.61309	320.615	4.25	77.4876	17.6227	0	3.42195	14.8416	0.875345	14.5526	0.308	0.972994	0.316549
230	6.6104	44.49	48.9117	3.13331	261.36	4.035	83.4872	14.9738	0.8227	5.20032	21.3752	1.29433	17.3301	0.394	0.689556	0.571382
232	6.3	48.85	44.8616	3.68822	278.108	4.542	72.0578	20.3276	7.2262	3.64786	15.9043	0.889041	13.0115	0.405	0.938001	0.431769
234	7.131	47.07	45.8011	3.58755	239.917	4.446	76.78	14.6094	7.3908	3.78927	16.1473	0.918094	11.5558	0.298	0.962748	0.309531
236	10.6605	49.25	40.0909	4.93659	296.423	5.365	63.2174	16.7805	13.2082	3.86147	16.4035	0.888413	11.7975	0.31	0.913728	0.33927
238	11.9004	52.65	35.4611	6.08954	297.357	6.661	57.9418	8.9972	26.0967	4.33372	18.4617	1.08023	8.61793	0.292	0.815434	0.358091
240	12.8208	71.83	15.3508	15.5697	414.869	14.955	0.1157	28.1377	61.7157	4.96154	21.263	1.20338	9.30232	0.364	0.693275	0.525045
242	8.48	53.84	37.6913	5.28493	219.422	6.012	59.5676	8.9711	28.7513	3.68286	15.687	0.920767	12.2879	0.374	0.984867	0.379747
244	20.35	41.44	38.2111	6.7747	397.132	5.733	56.4958	20.8188	0	3.62915	15.6255	0.93484	12.3607	0.436	1.16612	0.37389
246	18.361	40.86	40.7714	5.8791	466.478	5.368	67.3206	13.1209	2.1609	3.64455	14.973	0.923408	12.3061	0.397	0.952682	0.416718
248	13.142	48.21	38.6414	5.54694	365.286	5.556	56.5651	25.333	6.518	3.74664	14.9099	0.927406	12.0157	0.415	0.967539	0.428923
250	14.252	44.52	41.2611	5.12546	452.962	5.205	66.6553	17.915	4.1776	3.47257	15.0717	0.919129	11.1969	0.594	1.04584	0.567967
252	11.722	77.91	10.35	17.2255	376.37	16.625	0	20.0252	76.4847	3.54202	15.4913	0.884426	13.5859	0.45	1.00904	0.44597
254	18.0606	71.8	10.11	21.5272	323.369	22.406	0	2.2218	82.6314	6.17619	23.7025	1.3391	22.6259	0.496	0.563806	0.879736
256	31.4305	53.12	15.491	23.6119	510.639	18.224	0.1356	33.8958	26.7368	5.51923	21.2049	1.48355	21.5918	0.668	0.707944	0.943578
258	8.252	62.65	29.1111	7.7488	208.961	9.757	42.8209	0	56.7454	5.00667	19.3706	1.40154	20.7294	0.411	0.701475	0.585908
259	31.0105	55.14	13.831	23.874	317.453	24.249	0	19.5348	40.1532	4.90444	18.538	1.32795	22.7538	0.6	0.75845	0.791087
260	32.39	53.48	14.111	25.3182	411.716	25.119	0.1484	21.1911	36.8458	4.56173	17.1661	1.2971	21.557	0.795	0.85213	0.932956
262	9.6604	44.48	45.8614	3.81466	291.557	4.442	76.3556	14.7855	3.2097	3.60859	14.1983	0.911757	12.1466	0.715	0.921827	0.775634
264	12.45	42.46	45.1012	4.23717	345.556	4.555	74.9312	13.8402	1.3802	3.77206	14.9733	0.952637	13.7561	0.452	1.10861	0.407718
266	17.991	42.1	39.9111	5.94552	394.977	5.486	64.1313	13.9546	3.958	3.85757	15.0402	0.909947	12.4514	0.51	1.12523	0.453241
268	10.5607	44.15	45.2913	4.0188	370.035	4.522	75.123	15.0523	3.4163	3.97658	15.6314	0.941277	13.1248	0.443	0.884395	0.500908
270	10.62	46.25	43.1514	4.39937	338.446	4.843	69.5087	16.3921	7.1167	3.87477	15.4395	0.928696	12.7889	0.473	0.964714	0.490301
272	29.143	50.81	20.051	17.9817	462.752	10.54	0.2568	53.7175	6.0005	3.9439	15.3701	0.959373	13.1057	0.513	0.986683	0.519924
